# Supplementary material for: Loss of MeCP2 disrupts cell autonomous and autocrine BDNF signaling in mouse glutamatergic neurons
Source: eLife journal article supplement (doi:10.7554/elife.19374), 2016-10-26
Supplement: supp [file elife-19374-supp-v1.zip]

## Sheet: Contributing Author Information
Figure	Parameter measured	Statistical Test	N	Comparison	p-value
Figure 1B	Axon length	Student's t-test	WT: n=30, 38, 30, 28	DIV 2 (WT vs Null)	< 0.0001
			Null: n=28, 38, 31, 33	DIV 4	< 0.0001
				DIV 8	< 0.0001
				DIV 12	0.0002
Figure 1C	Axon length	Student's t-test	WT: n=12, 29, 23, 18	DIV 2 (WT vs Tg1)	0.2403
			Tg1: n=15, 26, 19, 12	DIV 4	0.3078
				DIV 8	0.363
				DIV 12	0.8489
Figure 1D	Dendrite length	Student's t-test	WT: n=28, 37, 30, 38	DIV 2 (WT vs Null)	0.0025
			Null: n=28, 39, 30, 33	DIV 4	0.0005
				DIV 8	0.0002
				DIV 12	0.0006
Figure 1E	Dendrite length	Student's t-test	WT: n=12, 33, 23, 12	DIV 2 (WT vs Tg1)	0.076
			Tg1: n=14, 25, 22, 12	DIV 4	0.226
				DIV 8	0.6579
				DIV 12	0.811
Figure 1G	Soma area	Student's t-test	WT: n=42, 33, 29, 22	DIV 2 (WT vs Null)	0.0024
			Null: n=40, 34, 30, 23	DIV 4	< 0.0001
				DIV 8	< 0.0001
				DIV 12	< 0.0001
Figure 1H	Soma area	Student's t-test	WT: n=12, 34, 23, 19	DIV 2 (WT vs Tg1)	0.283
			Tg1: n=15, 27, 22, 17	DIV 4	0.766
				DIV 8	0.8827
				DIV 12	0.241
Figure 2C	Dendrite length	ONE-WAY ANOVA	WT, Null, Null+BDNF,	WT vs Null	< 0.001
		Dunn's Multiple comparison test	Null+BDNF+ANA12, WT+ANA12	Null vs Null+BDNF	< 0.01
			Null+ANA12; n=29, 27, 14, 30, 26, 31	WT vs Null+BDNF	> 0.05
				Null+BDNF vs Null+BDNF+ANA12	< 0.05
				WT vs WT+ANA12	< 0.001
				Null vs Null+ANA12	> 0.05
Figure 2D	Synapse number	ONE-WAY ANOVA	n=28, 28, 13, 30, 24, 31	WT vs Null	< 0.001
		Dunn's Multiple comparison test		Null vs Null+BDNF	< 0.01
				WT vs Null+BDNF	> 0.05
				Null+BDNF vs Null+BDNF+ANA12	< 0.01
				WT vs WT+ANA12	< 0.05
				Null vs Null+ANA12	> 0.05
			n=29, 27, 13, 24, 26, 31	WT vs Null	< 0.001
Figure 2E	Soma area	ONE-WAY ANOVA		Null vs Null+BDNF	< 0.01
		Dunn's Multiple comparison test		WT vs Null+BDNF	> 0.05
				Null+BDNF vs Null+BDNF+ANA12	< 0.05
				WT vs WT+ANA12	< 0.01
				Null vs Null+ANA12	> 0.05
Figure 2G	EPSC amplitude		n=31, 24, 22, 29, 22, 21	WT vs Null	< 0.05
		ONE-WAY ANOVA		Null vs Null+BDNF	< 0.01
		Dunn's Multiple comparison test		WT vs Null+BDNF	> 0.05
				Null+BDNF vs Null+BDNF+ANA12	< 0.001
				WT vs WT+ANA12	< 0.05
				Null vs Null+ANA12	> 0.05
Figure 2I	RRP charge		n=34, 34, 33, 35, 21, 22	WT vs Null	< 0.01
		ONE-WAY ANOVA		Null vs Null+BDNF	< 0.01
		Dunn's Multiple comparison test		WT vs Null+BDNF	> 0.05
				Null+BDNF vs Null+BDNF+ANA12	< 0.001
				WT vs WT+ANA12	< 0.05
				Null vs Null+ANA12	> 0.05
Figure 2J	Pvr		n=35, 36, 32, 32, 24, 24	WT vs Null	> 0.05
		ONE-WAY ANOVA		Null vs Null+BDNF	> 0.05
		Dunn's Multiple comparison test		WT vs Null+BDNF	> 0.05
				Null+BDNF vs Null+BDNF+ANA12	> 0.05
				WT vs WT+ANA12	> 0.05
				Null vs Null+ANA12	> 0.05
			n=29, 24, 21, 28, 24, 24	WT vs Null	> 0.05
Figure 2K	Paired pulse ratio	ONE-WAY ANOVA		Null vs Null+BDNF	> 0.05
		Dunn's Multiple comparison test		WT vs Null+BDNF	> 0.05
				Null+BDNF vs Null+BDNF+ANA12	> 0.05
				WT vs WT+ANA12	> 0.05
				Null vs Null+ANA12	> 0.05
Figure 3C	EPSC amplitude		WT, Null, Null+BDNF, Null+BDNF+Neut	WT vs Null	< 0.05
		ONE-WAY ANOVA	n=36, 37, 51, 52	Null vs Null+BDNF	< 0.05
		Dunn's Multiple comparison test		WT vs Null+BDNF	> 0.05
				WT vs Null+BDNF+Neut	< 0.05
				Null+BDNF vs Null+BDNF+Neut	< 0.01
Figure 3E	RRP charge		n=37, 34, 50, 50	WT vs Null	< 0.01
		ONE-WAY ANOVA		Null vs Null+BDNF	< 0.05
		Dunn's Multiple comparison test		WT vs Null+BDNF	> 0.05
				WT vs Null+BDNF+Neut	< 0.001
				Null+BDNF vs Null+BDNF+Neut	< 0.01
Figure 3F	Pvr		n=37, 37, 50, 48	WT vs Null	> 0.05
		ONE-WAY ANOVA		Null vs Null+BDNF	> 0.05
		Dunn's Multiple comparison test		WT vs Null+BDNF	> 0.05
				WT vs Null+BDNF+Neut	> 0.05
				Null+BDNF vs Null+BDNF+Neut	> 0.05
Figure 3G	Paired pulse ratio		n=35, 35, 50, 49	WT vs Null	> 0.05
		ONE-WAY ANOVA		Null vs Null+BDNF	> 0.05
		Dunn's Multiple comparison test		WT vs Null+BDNF	> 0.05
				WT vs Null+BDNF+Neut	> 0.05
				Null+BDNF vs Null+BDNF+Neut	> 0.05
Figure 3I	EPSC amplitude		WT, WT+BDNF, Null, Null+BDNF,	WT vs Null	< 0.05
		ONE-WAY ANOVA	Null+BDNF+ANA12	Null vs Null+BDNF	< 0.001
		Dunn's Multiple comparison test	n=50, 19, 39, 34, 29	WT vs Null+BDNF	> 0.05
				WT vs Null+BDNF+ANA12	< 0.05
				Null+BDNF vs Null+BDNF+ANA12	< 0.001
Figure 3J	RRP charge		n=48, 18, 38, 32, 28	WT vs Null	< 0.01
		ONE-WAY ANOVA		Null vs Null+BDNF	< 0.001
		Dunn's Multiple comparison test		WT vs Null+BDNF	> 0.05
				WT vs Null+BDNF+ANA12	< 0.001
				Null+BDNF vs Null+BDNF+ANA12	< 0.001
Figure 3K	Dendrite length		n=40, 40, 40, 38, 30	WT vs Null	< 0.001
		ONE-WAY ANOVA		Null vs Null+BDNF	< 0.001
		Dunn's Multiple comparison test		WT vs Null+BDNF	> 0.05
				WT vs Null+BDNF+ANA12	< 0.001
				Null+BDNF vs Null+BDNF+ANA12	< 0.001
Figure 3L	Synapse number		n=40, 40, 40, 38, 31	WT vs Null	< 0.001
		ONE-WAY ANOVA		Null vs Null+BDNF	< 0.001
		Dunn's Multiple comparison test		WT vs Null+BDNF	> 0.05
				WT vs Null+BDNF+ANA12	< 0.01
				Null+BDNF vs Null+BDNF+ANA12	< 0.001
Figure 3M	Soma area		n=40, 40, 40, 38, 30	WT vs Null	< 0.001
		ONE-WAY ANOVA		Null vs Null+BDNF	< 0.001
		Tukey's Multiple comparison test		WT vs Null+BDNF	> 0.05
				WT vs Null+BDNF+ANA12	< 0.001
				Null+BDNF vs Null+BDNF+ANA12	< 0.001
Figure 3 - figure supplement 1B	EPSC amplitude		n=59, 57, 58, 57	WT vs Null	< 0.05
		ONE-WAY ANOVA		Null vs Null+NGF	> 0.05
		Dunn's Multiple comparison test		WT vs Null+NGF	> 0.05
				WT vs WT+NGF	> 0.05
Figure 3 - figure supplement 1C	RRP charge		n=56, 53, 56, 55	WT vs Null	< 0.01
		ONE-WAY ANOVA		Null vs Null+NGF	> 0.05
		Dunn's Multiple comparison test		WT vs Null+NGF	> 0.05
				WT vs WT+NGF	> 0.05
Figure 3 - figure supplement 1D	Pvr		n=59, 57, 58, 56	WT vs Null	> 0.05
		ONE-WAY ANOVA		Null vs Null+NGF	> 0.05
		Dunn's Multiple comparison test		WT vs Null+NGF	> 0.05
				WT vs WT+NGF	> 0.05
Figure 3 - figure supplement 1E	Paired pulse ratio		n=37, 35, 41, 38	WT vs Null	> 0.05
		ONE-WAY ANOVA		Null vs Null+NGF	> 0.05
		Dunn's Multiple comparison test		WT vs Null+NGF	> 0.05
				WT vs WT+NGF	> 0.05
Figure 3 - figure supplement 2A	Pvr		n=47, 17, 39, 33, 24	WT vs Null	> 0.05
		ONE-WAY ANOVA		Null vs Null+BDNF	> 0.05
		Dunn's Multiple comparison test		WT vs Null+BDNF	> 0.05
				WT vs Null+BDNF+ANA12	> 0.05
				Null+BDNF vs Null+BDNF+ANA12	> 0.05
			n=46, 16, 36, 32, 26	WT vs Null	> 0.05
Figure 3 - figure supplement 2B	Paired pulse ratio	ONE-WAY ANOVA		Null vs Null+BDNF	> 0.05
		Dunn's Multiple comparison test		WT vs Null+BDNF	> 0.05
				WT vs Null+BDNF+ANA12	< 0.05
				Null+BDNF vs Null+BDNF+ANA12	> 0.05
Figure 4C			WT/Null: 77, 80	WT vs Null	< 0.001
	Synapse density	ONE-WAY ANOVA	WT+BDNF/Null: 71, 72	WT+BDNF vs Null	< 0.001
		Dunn's Multiple comparison test	WT/Null+BDNF: 71, 72	WT vs Null+BDNF	> 0.05
				Null(1) vs Null+BDNF	< 0.001
				Null(2) vs Null+BDNF	< 0.01
Figure 5B	Synapse density		WT/Null: 40, 40	WT vs Null	> 0.05
		ONE-WAY ANOVA	WT+BDNF/Null: 40, 40	WT+BDNF vs Null	> 0.05
		Dunn's Multiple comparison test	WT/Null+BDNF: 40, 40	WT vs Null+BDNF	> 0.05
				Null(1) vs Null+BDNF	> 0.05
				Null(2) vs Null+BDNF	> 0.05
Figure 5D-left	Synapse density		WT: 38, 27; Null: 38, 27	Wtpre vs Nullpre	< 0.001
		ONE-WAY ANOVA		Wtpost vs Nullpost	< 0.001
		Dunn's Multiple comparison test		Wtpre vs Wtpost	> 0.05
				Nullpre vs Nullpost	> 0.05
Figure 5D-middle	Synapse density		WT+BDNF: 27, 28; Null: 24, 28	Wt+BDNFpre vs Nullpre	< 0.001
		ONE-WAY ANOVA		Wt+BDNFpost vs Nullpost	< 0.001
		Dunn's Multiple comparison test		Wt+BDNFpre vs Wt+BDNFpost	> 0.05
				Nullpre vs Nullpost	> 0.05
Figure 5D-right	Synapse density		WT: 32, 35; Null+BDNF: 30, 35	Wtpre vs Null+BDNFpre	> 0.05
		ONE-WAY ANOVA		Wtpost vs Nul+BDNFpost	> 0.05
		Dunn's Multiple comparison test		Wtpre vs Wtpost	> 0.05
				Null+BDNFpre vs Null+BDNFpost	> 0.05
Figure 5F	Nucleus size	Student's t-test	MeCP2+: 257; MeCP2-: 284	MeCP2+ vs MeCP2-	< 0.0001
Figure 5G	Nucleus size	Student's t-test	MeCP2+: 511; MeCP2-: 493	MeCP2+ vs MeCP2-	< 0.0001
Figure 5-figure supplement 1D	BDNF release	Student's t-test	WT: 1464, Null: 895	WT vs Null	0.055
Figure 5-figure supplement 1G	BDNF surface fraction	Student's t-test	WT: 1480, Null: 900	WT vs Null	0.0775
